# Supplementary material for: A Comparative Analysis of Chip Shape, Residual Stresses, and Surface Roughness in Minimum-Quantity-Lubrication Turning with Various Flow Rates
Source: Research Square preprint supplement (doi:10.21203/rs.3.rs-1443976/v1), 2022-03-30
Supplement: Supplementary file 1 [file aceab0000b0487eea30ba25a.docx]

| **Table 3** Influence of cutting speed and MQL flow rate on chip shape | | | |
| --- | --- | --- | --- |
| [] | MQL1 | MQL2 | MQL3 |
| 145 | 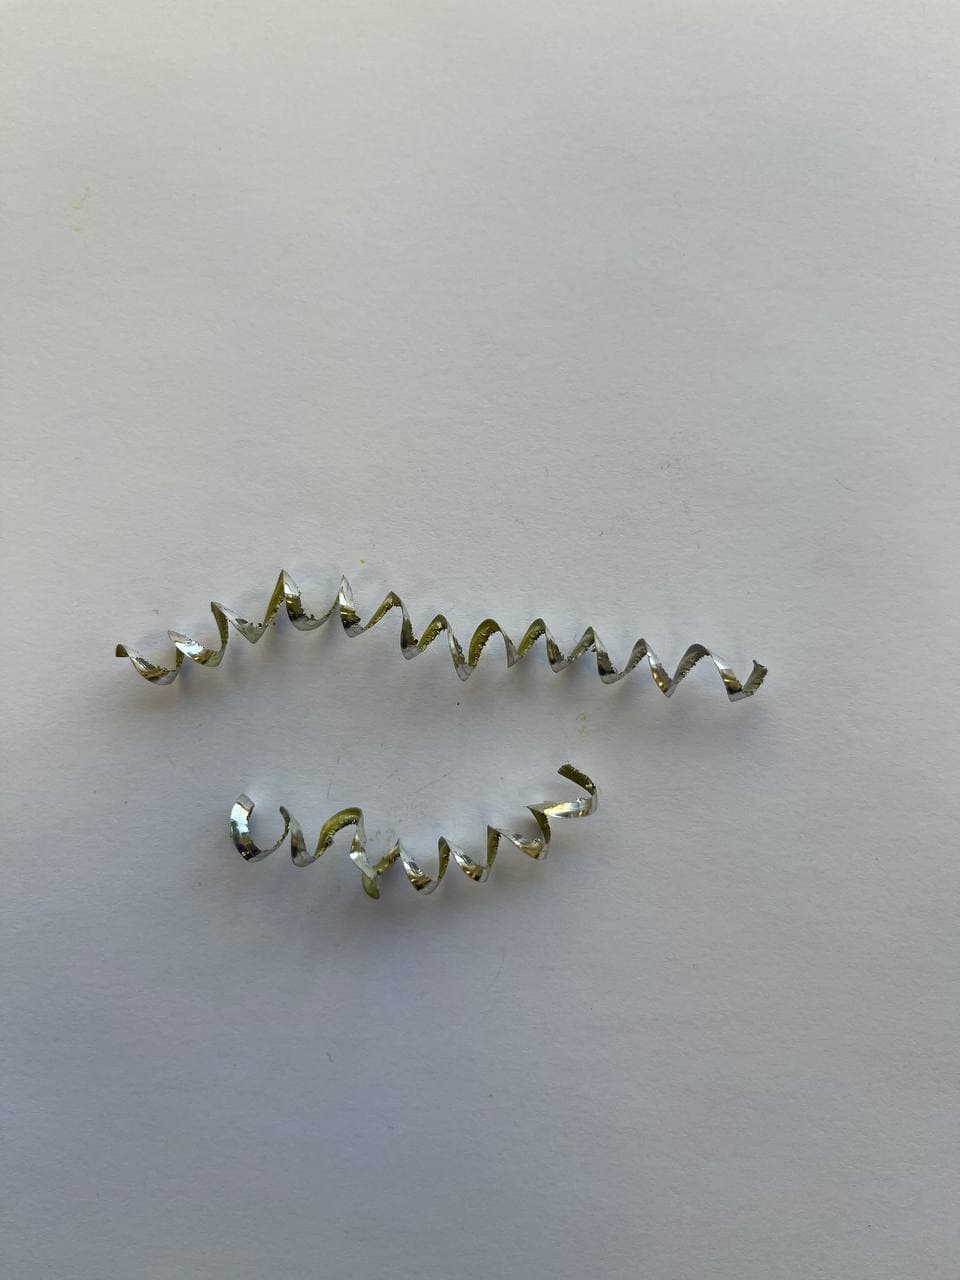 | 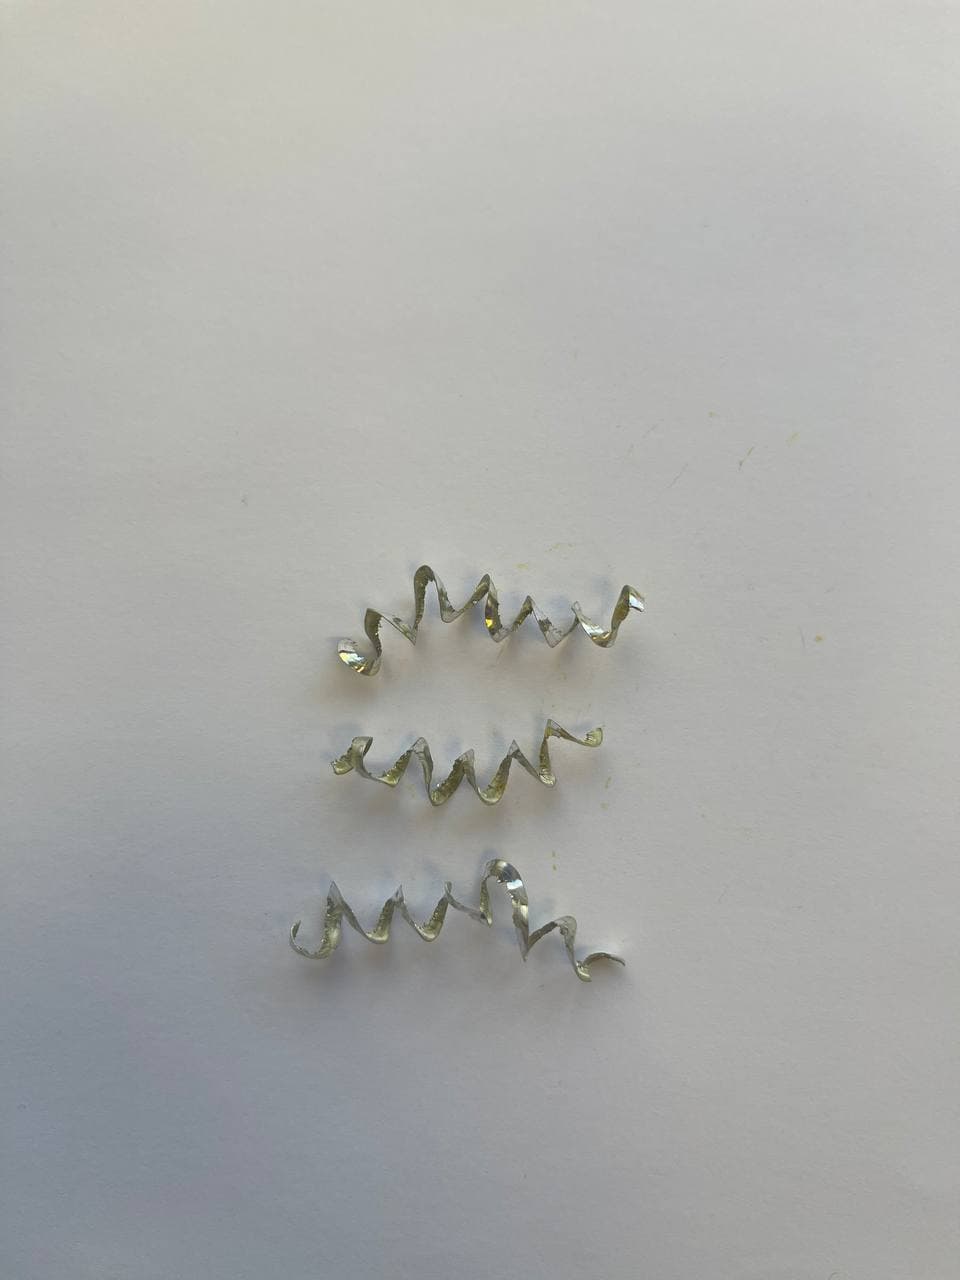 | 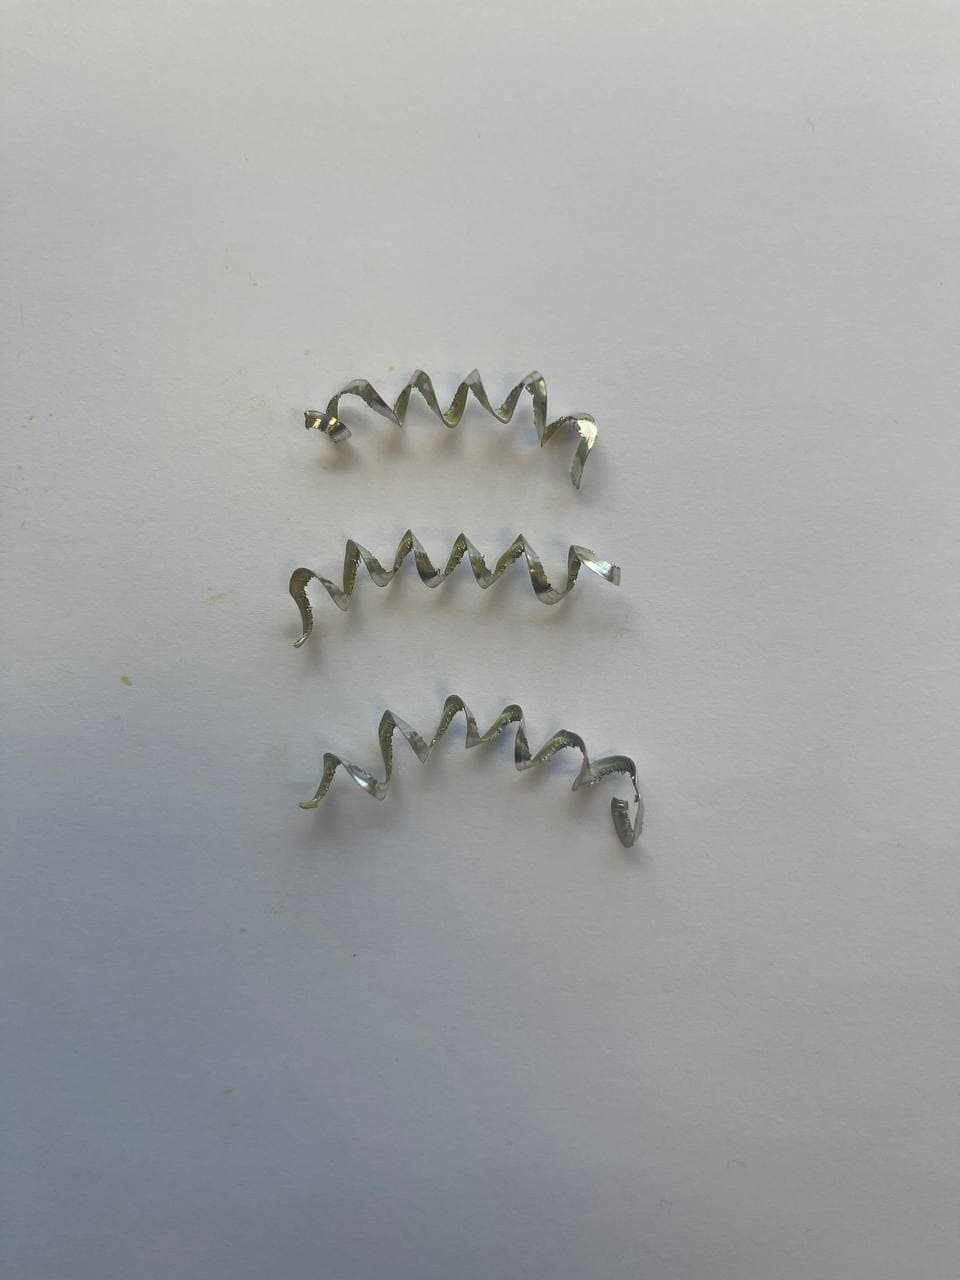 |
| 650 | 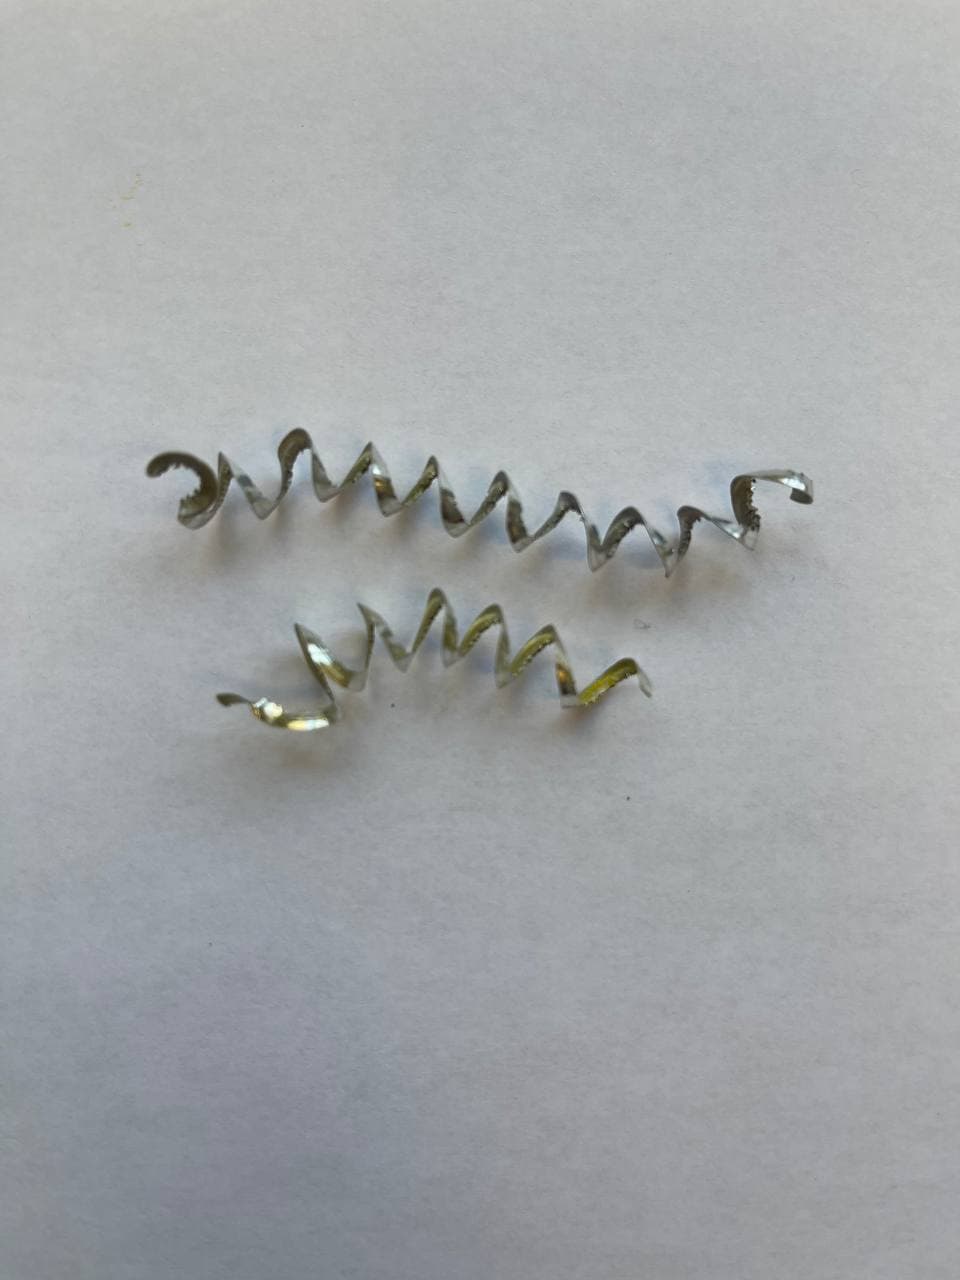 | 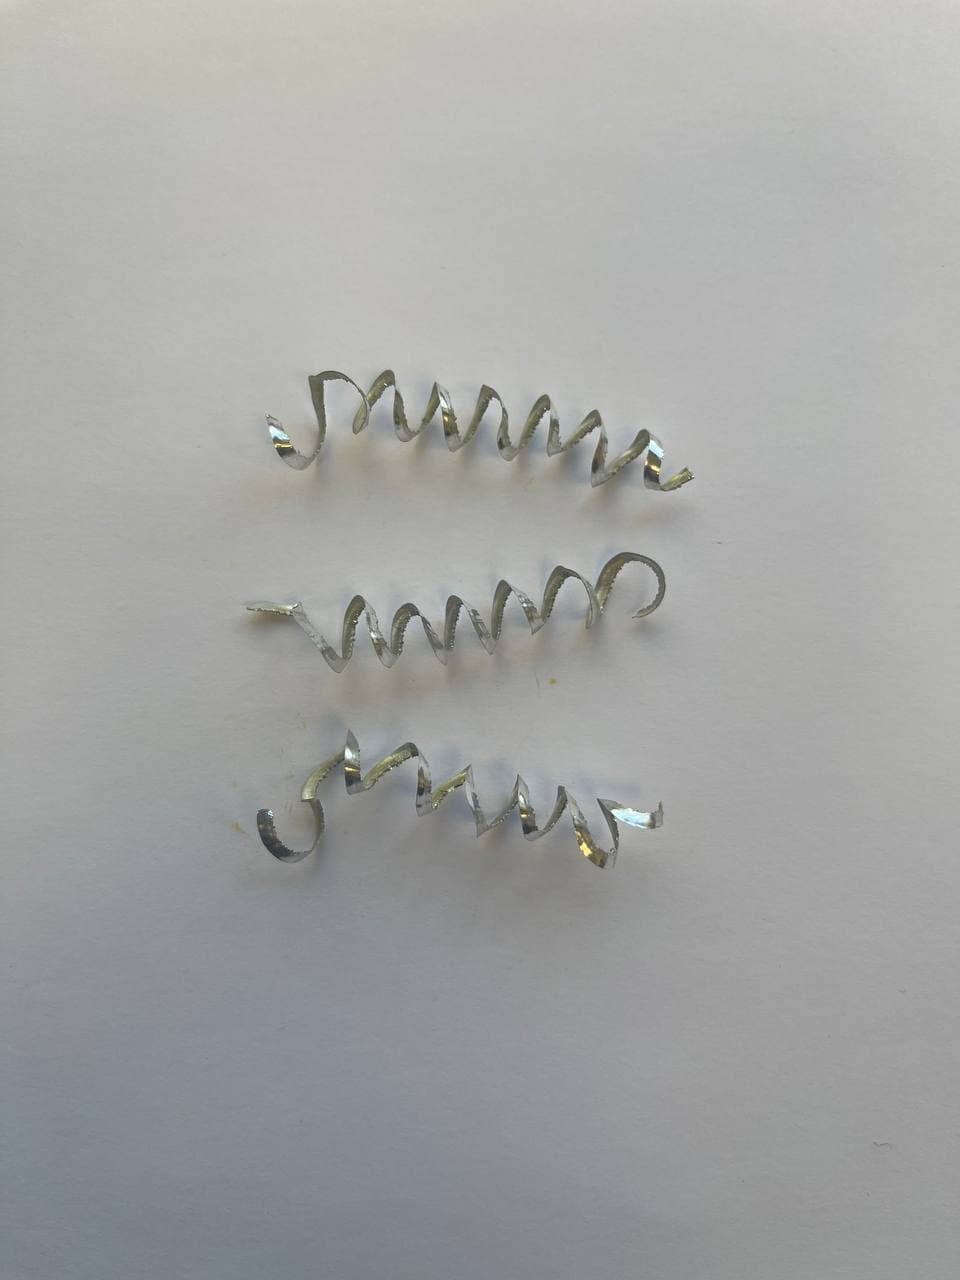 | 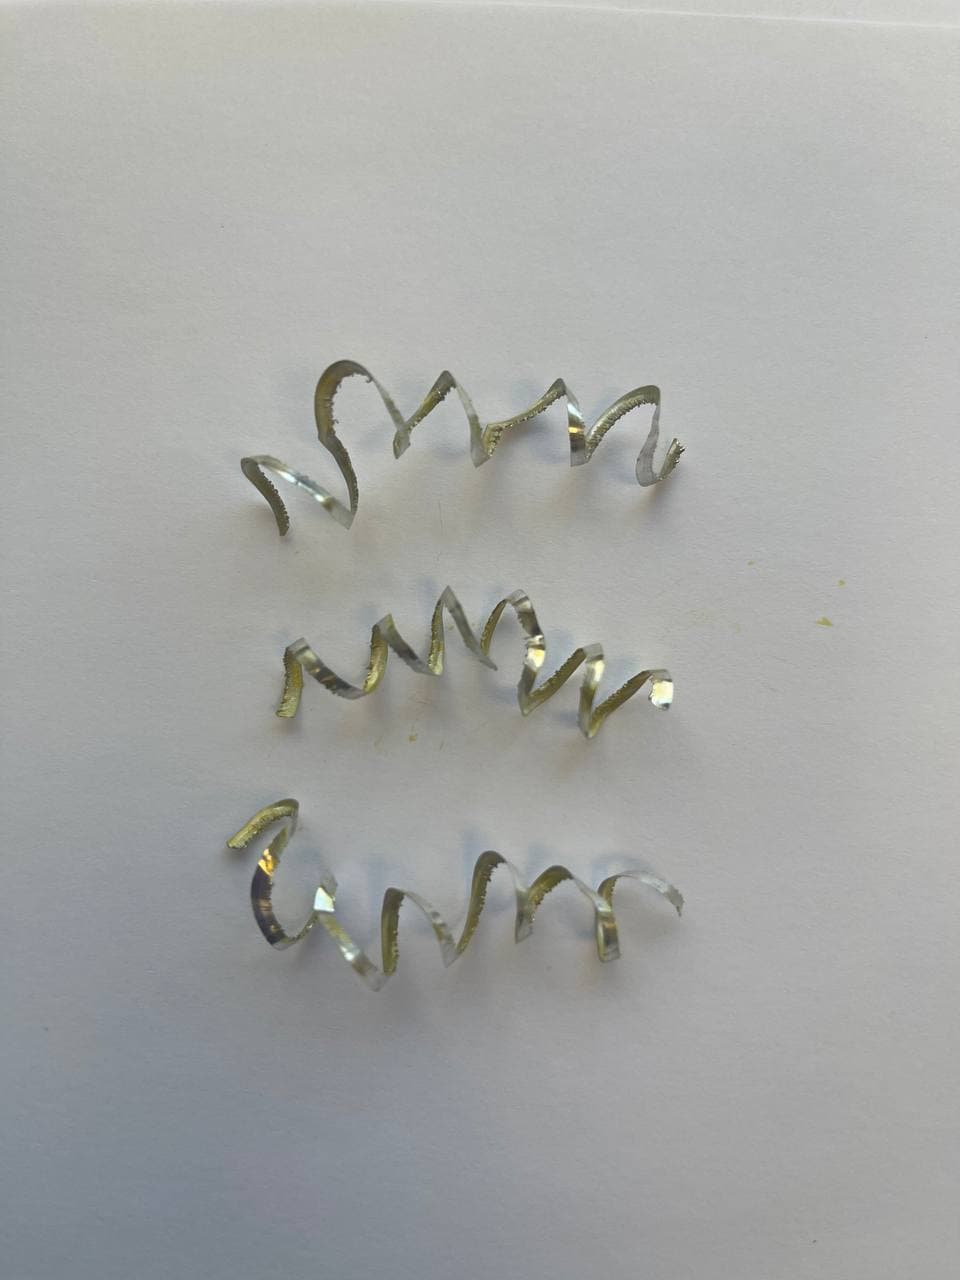 |
| 1155 | 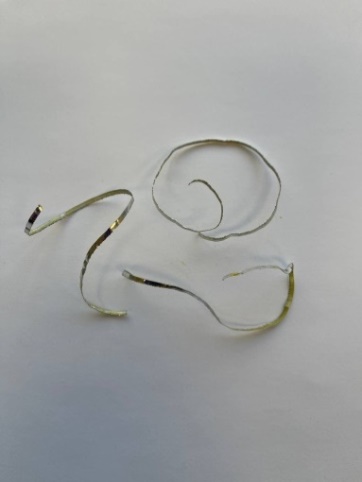 | 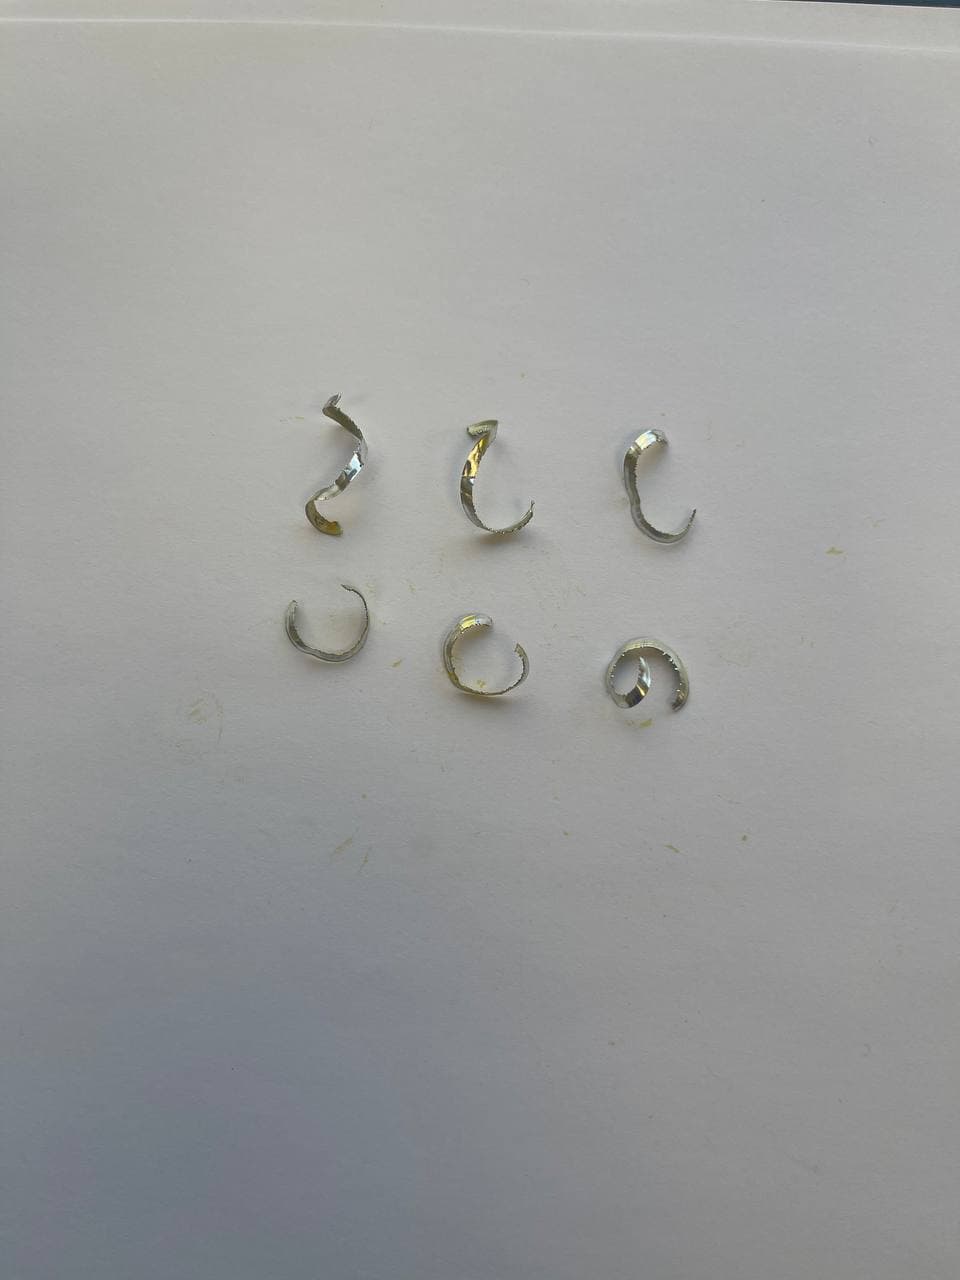 | 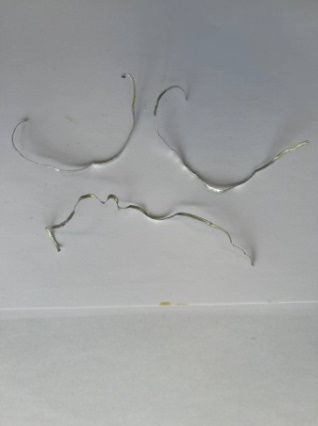 |

| **Table 4** Impact of feed rate and MQL flow rate on chip shape | | | |
| --- | --- | --- | --- |
|  | MQL1 | MQL2 | MQL3 |
| 0.07 | 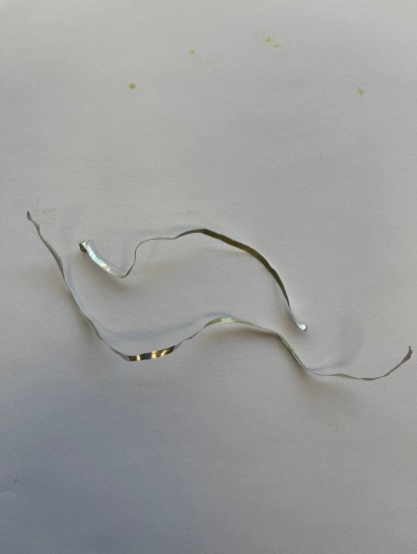 | 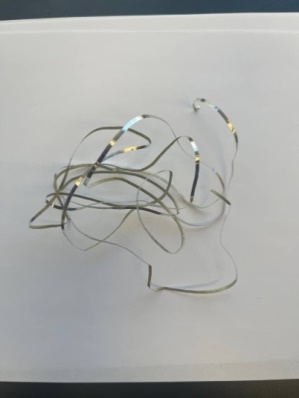 | 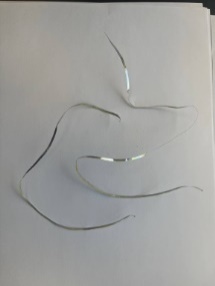 |
| 0.19 | 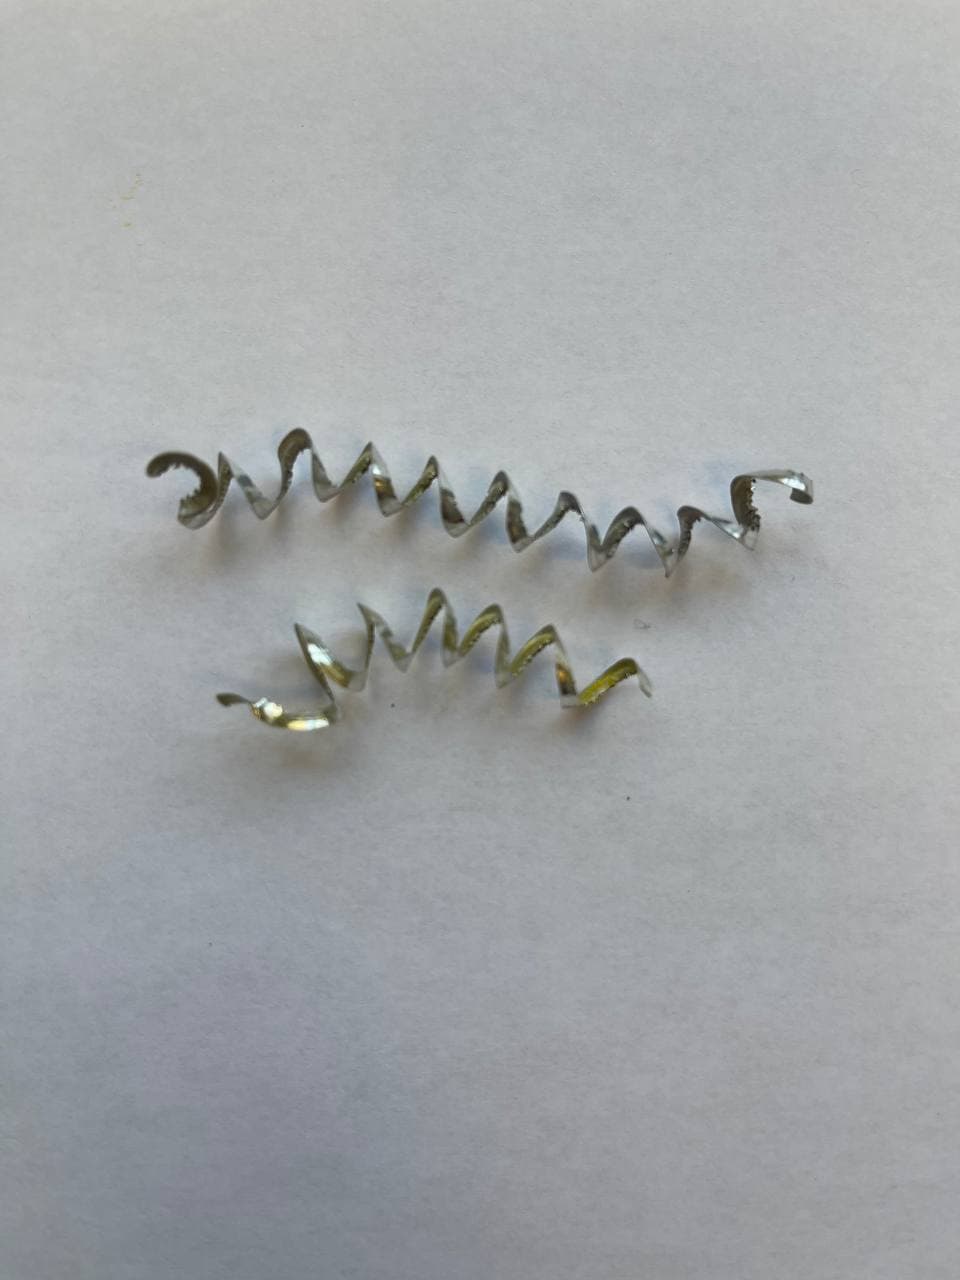 | 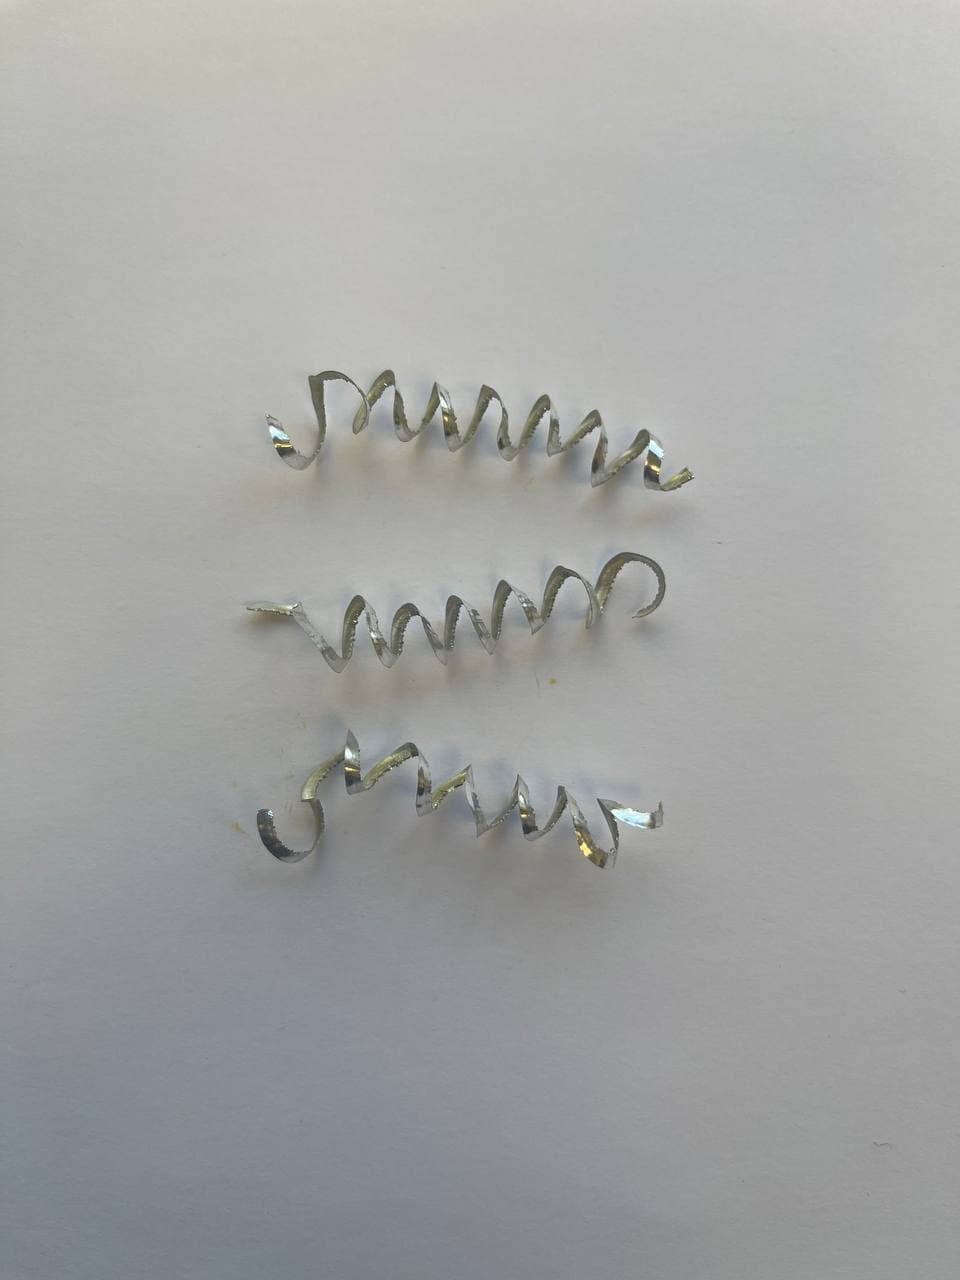 | 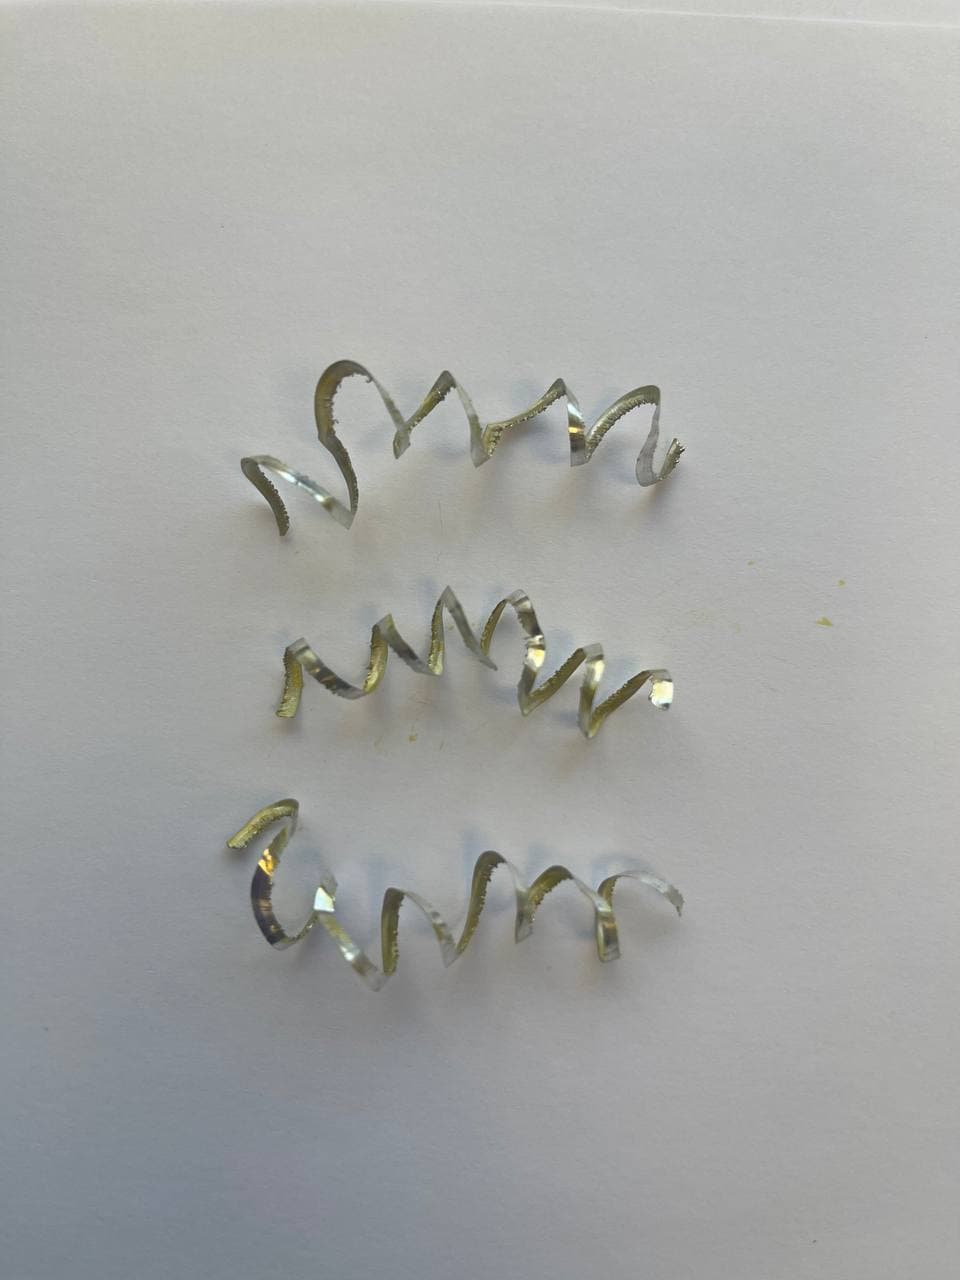 |
| 0.31 | 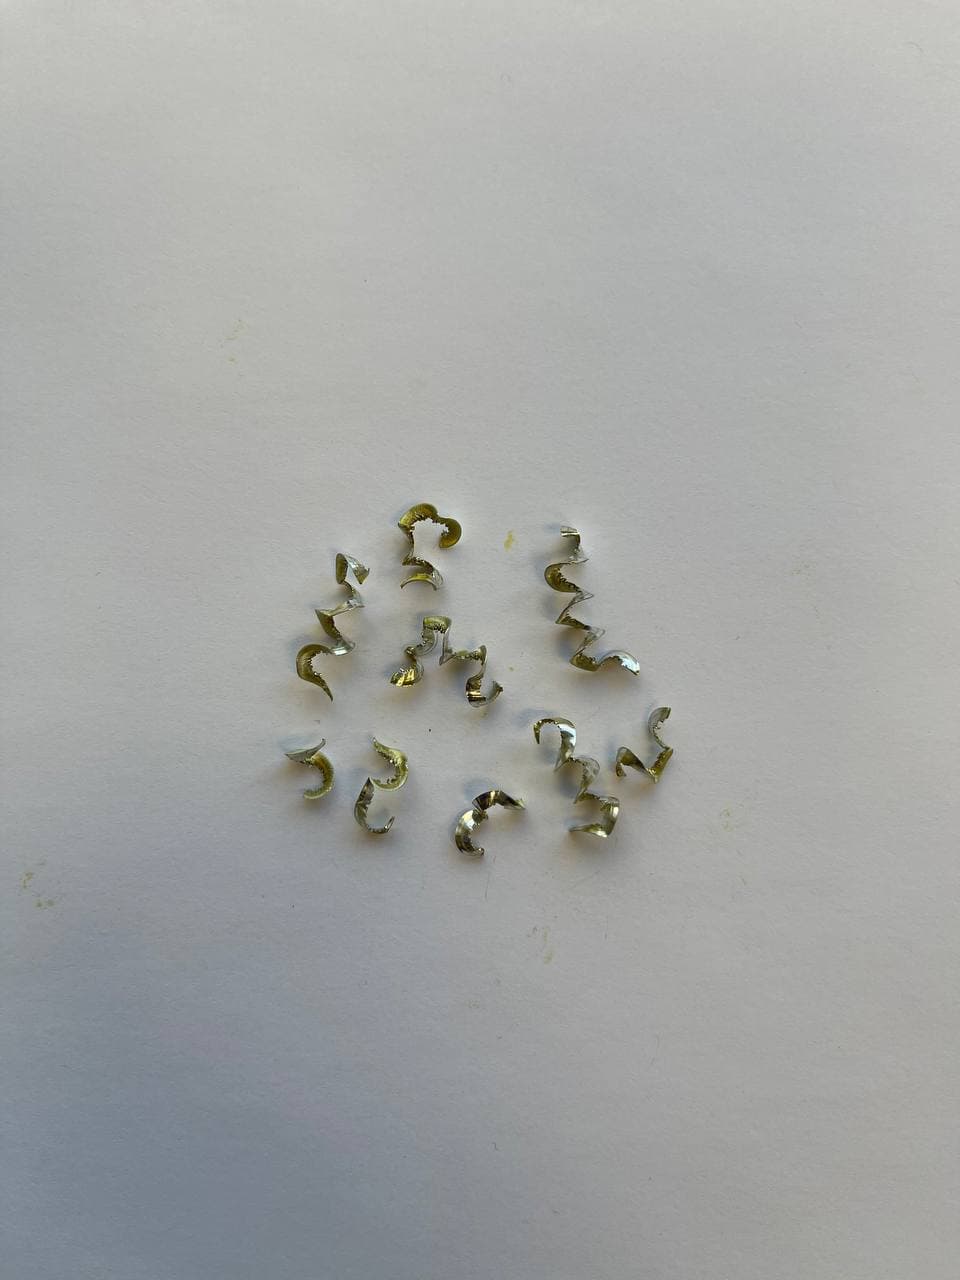 | 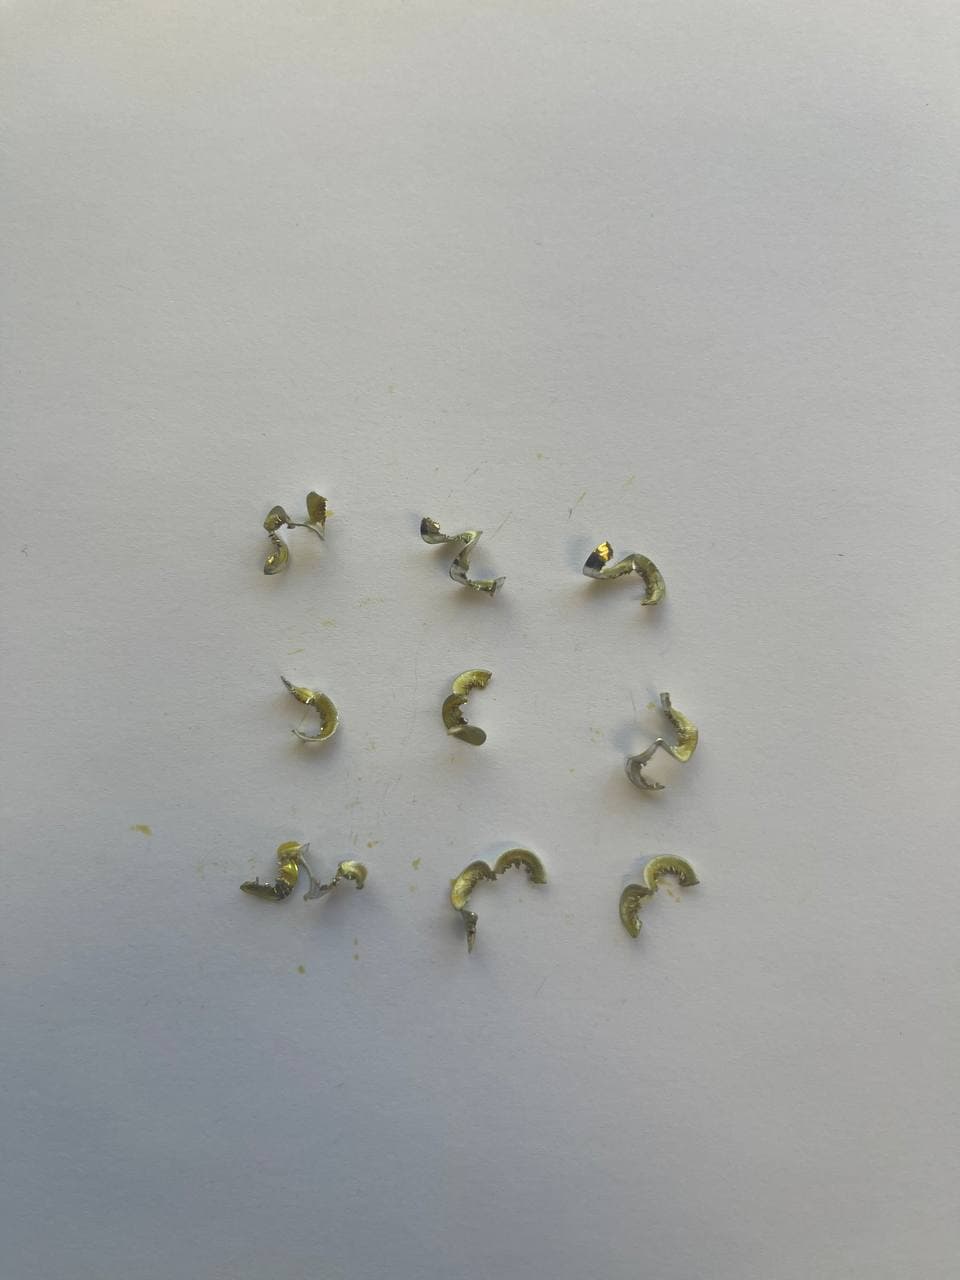 | 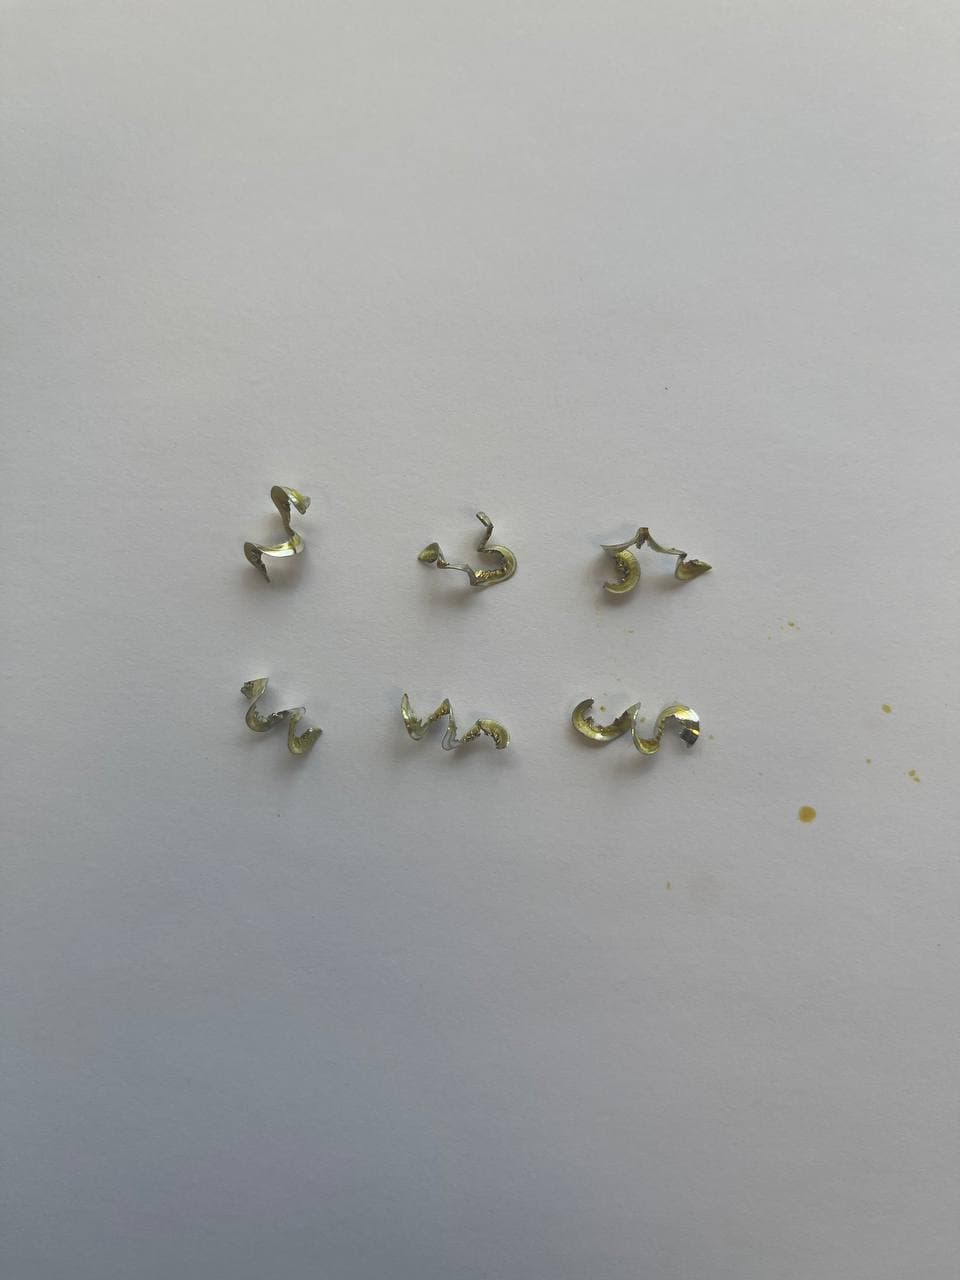 |

| **Table 5** Effect of cutting speed and MQL flow rate on chip shape | | | |
| --- | --- | --- | --- |
| 𝐷 [mm] | MQL1 | MQL2 | MQL3 |
| 0.66 | 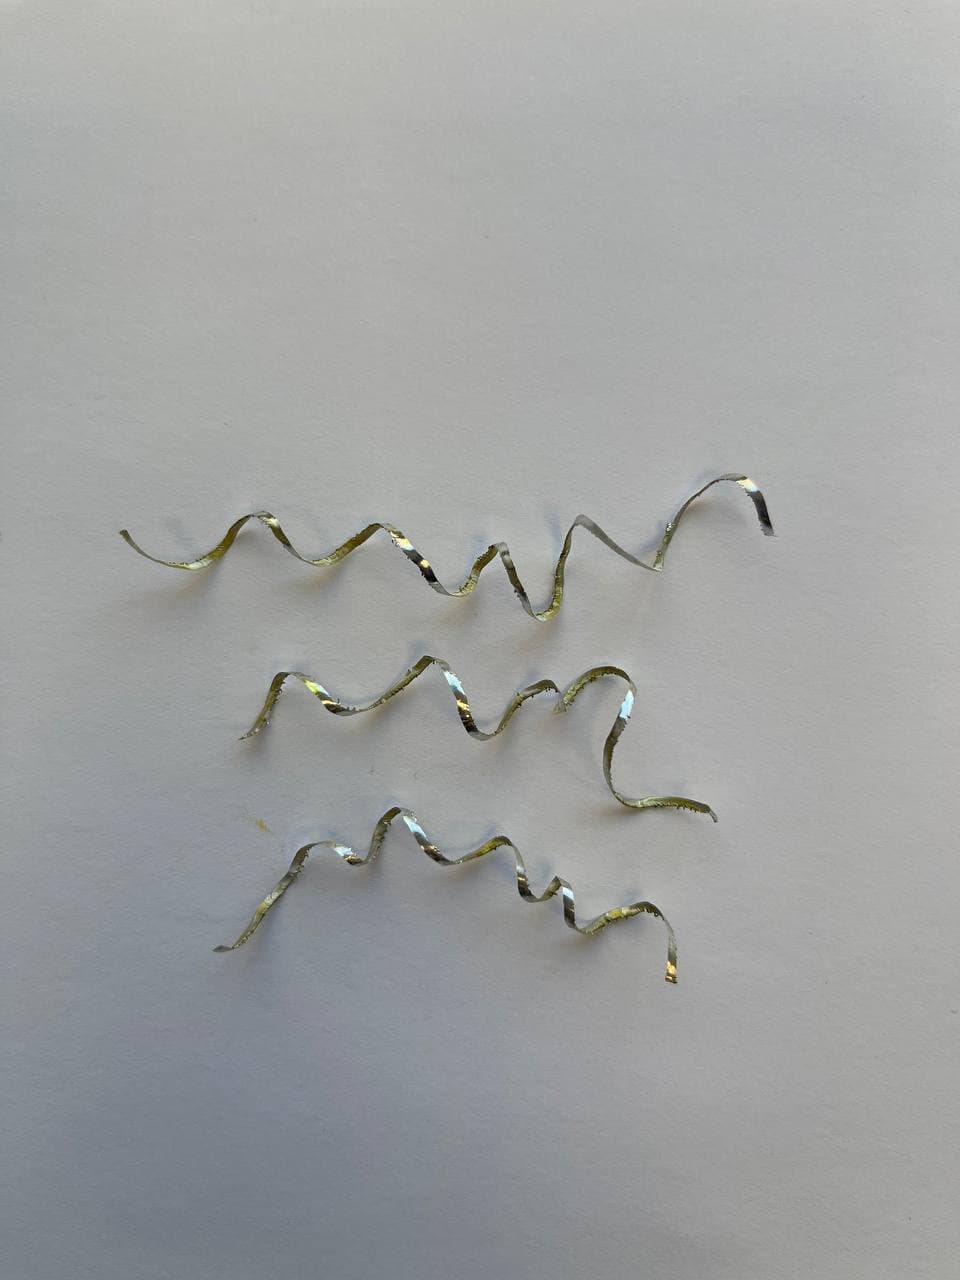 | 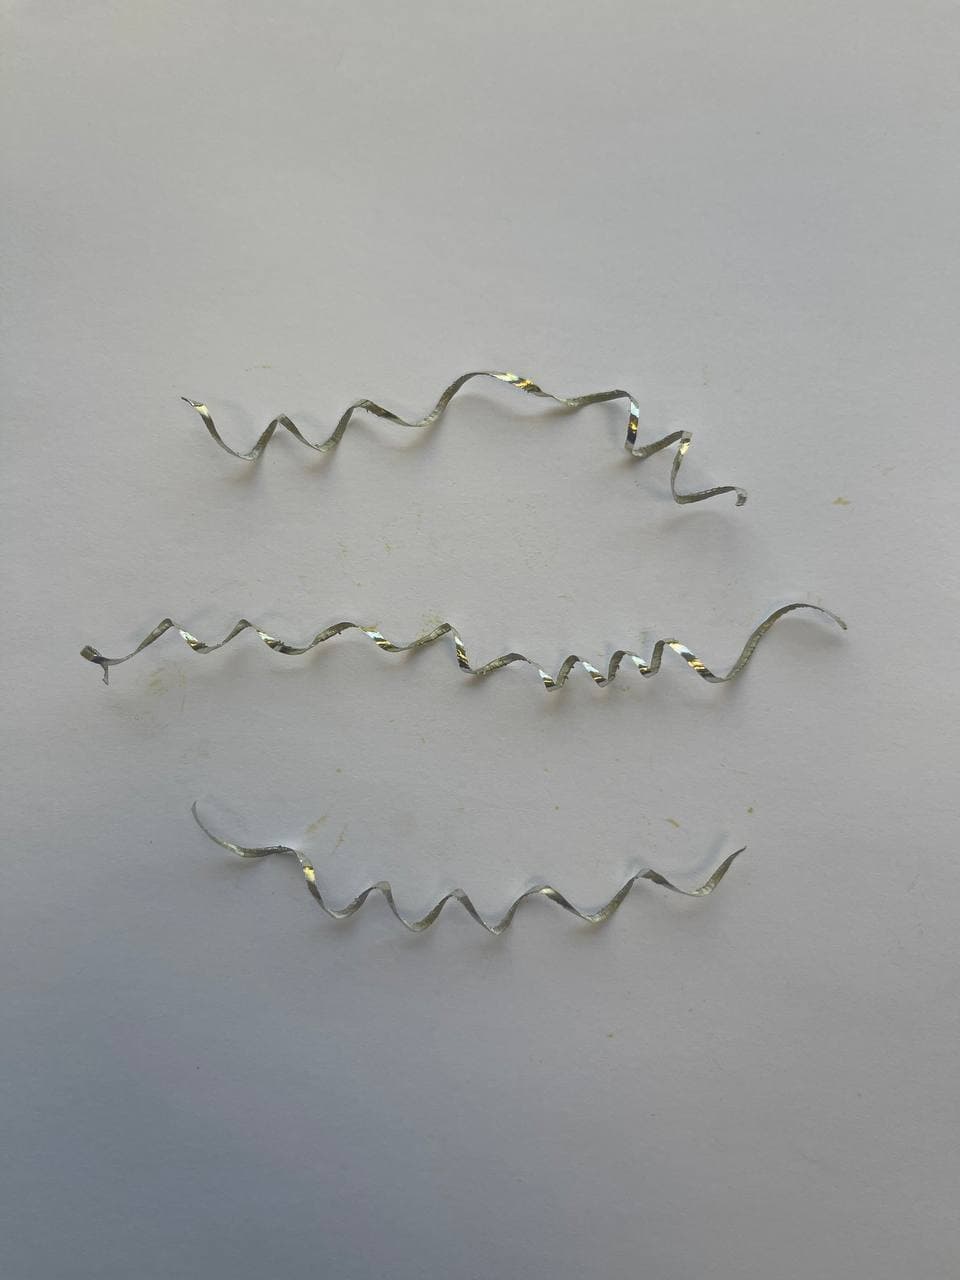 | 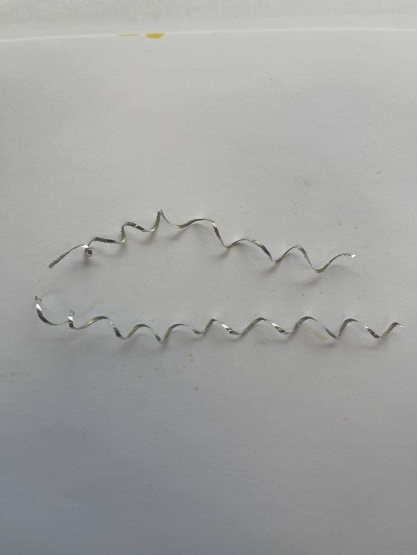 |
| 1.5 | 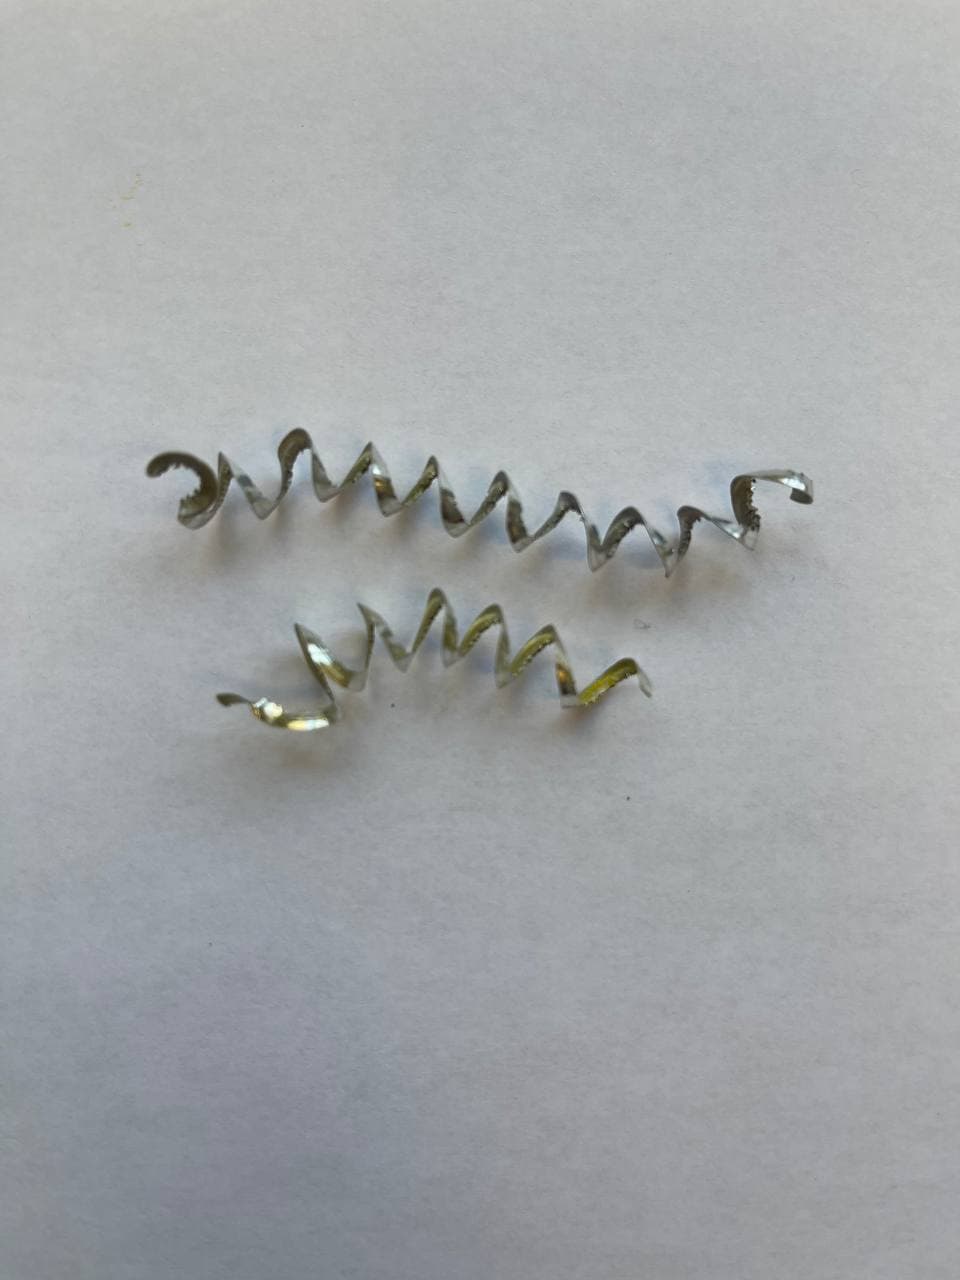 | 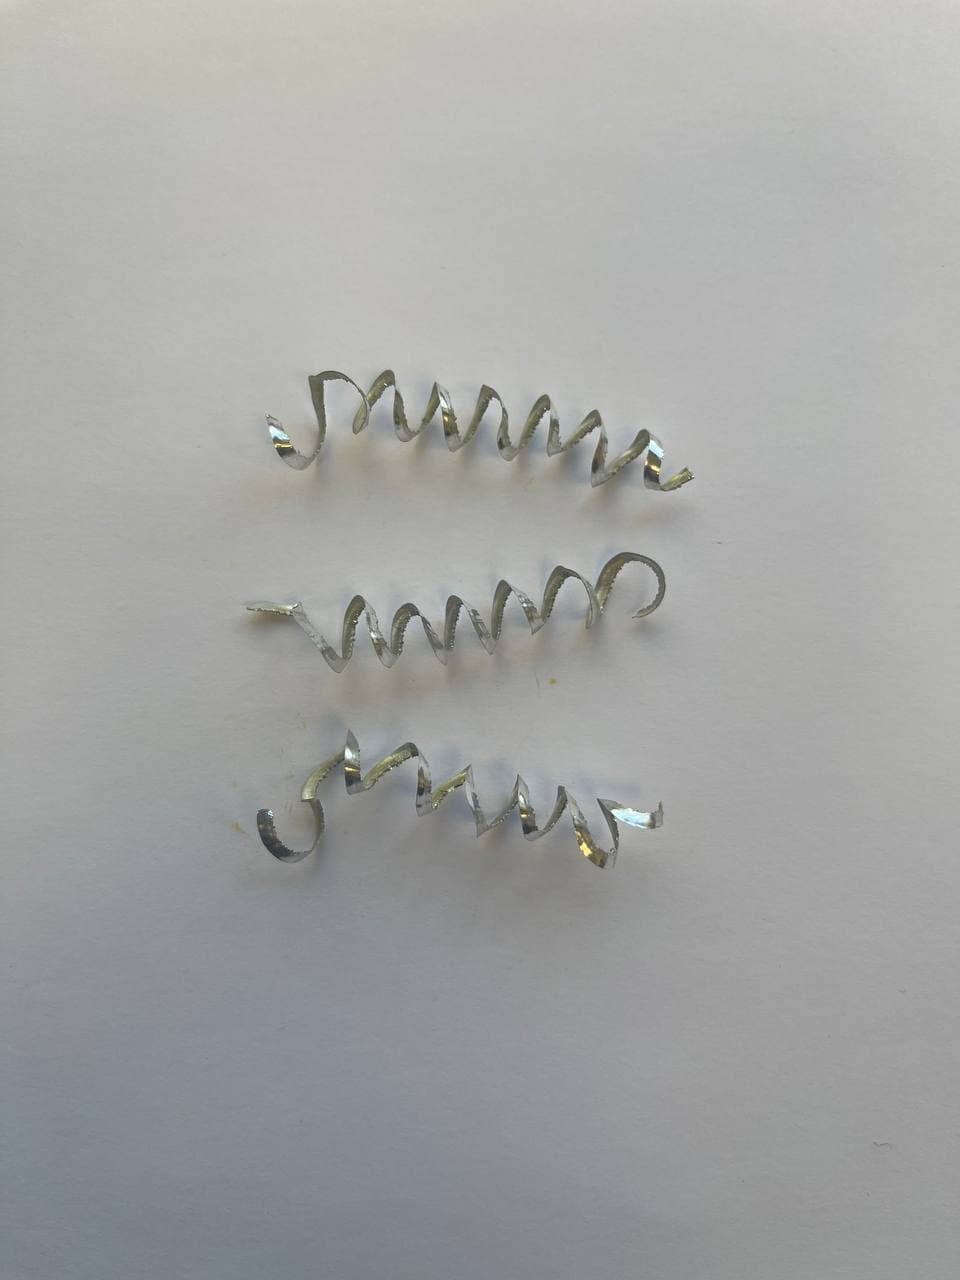 | 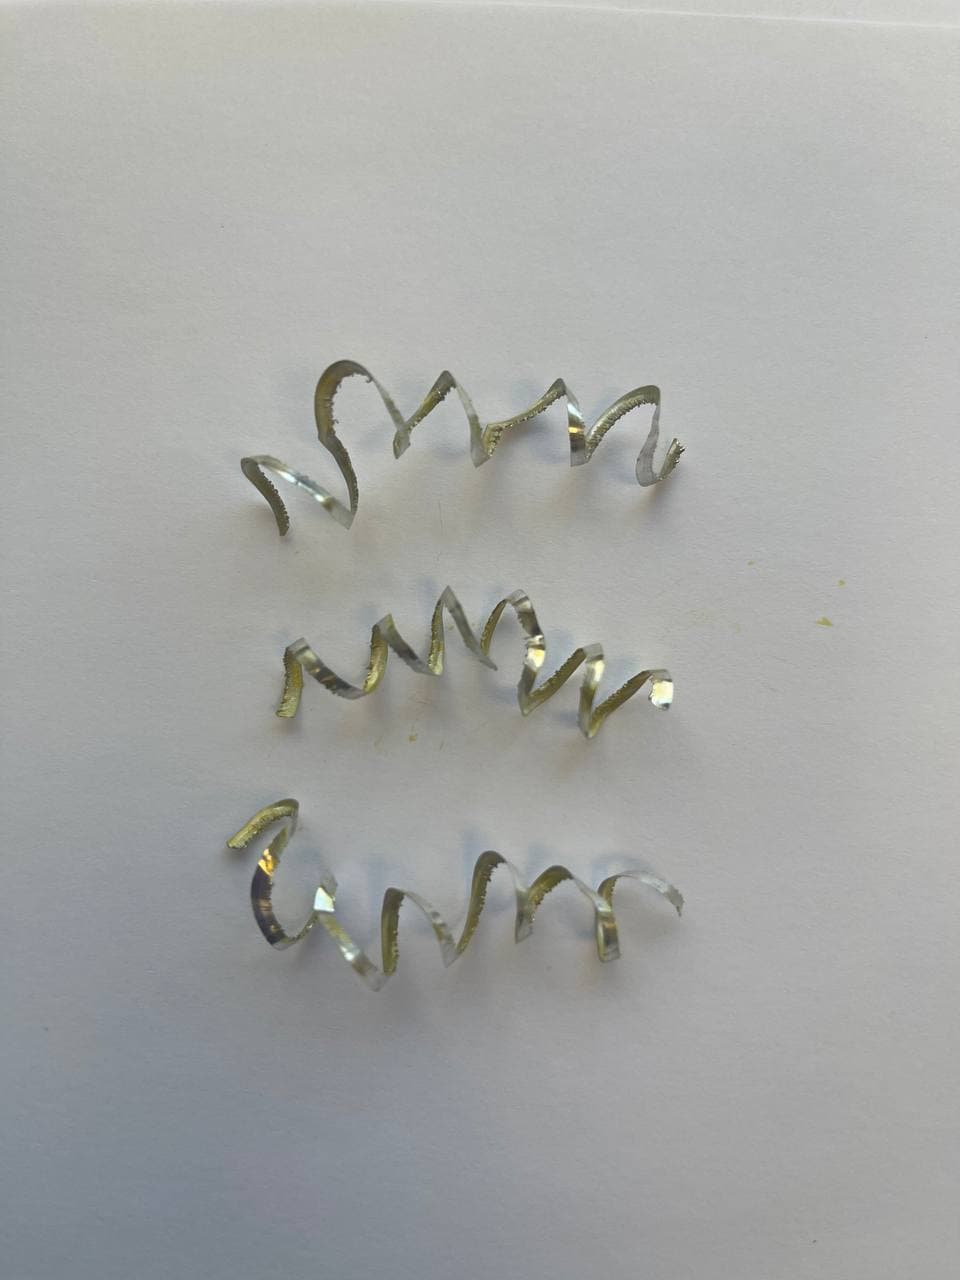 |
| 2.34 | 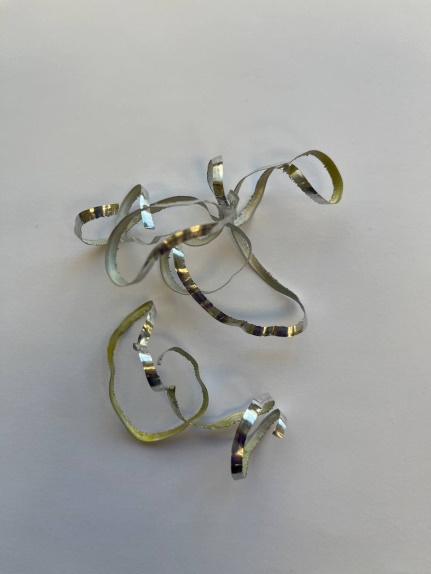 | 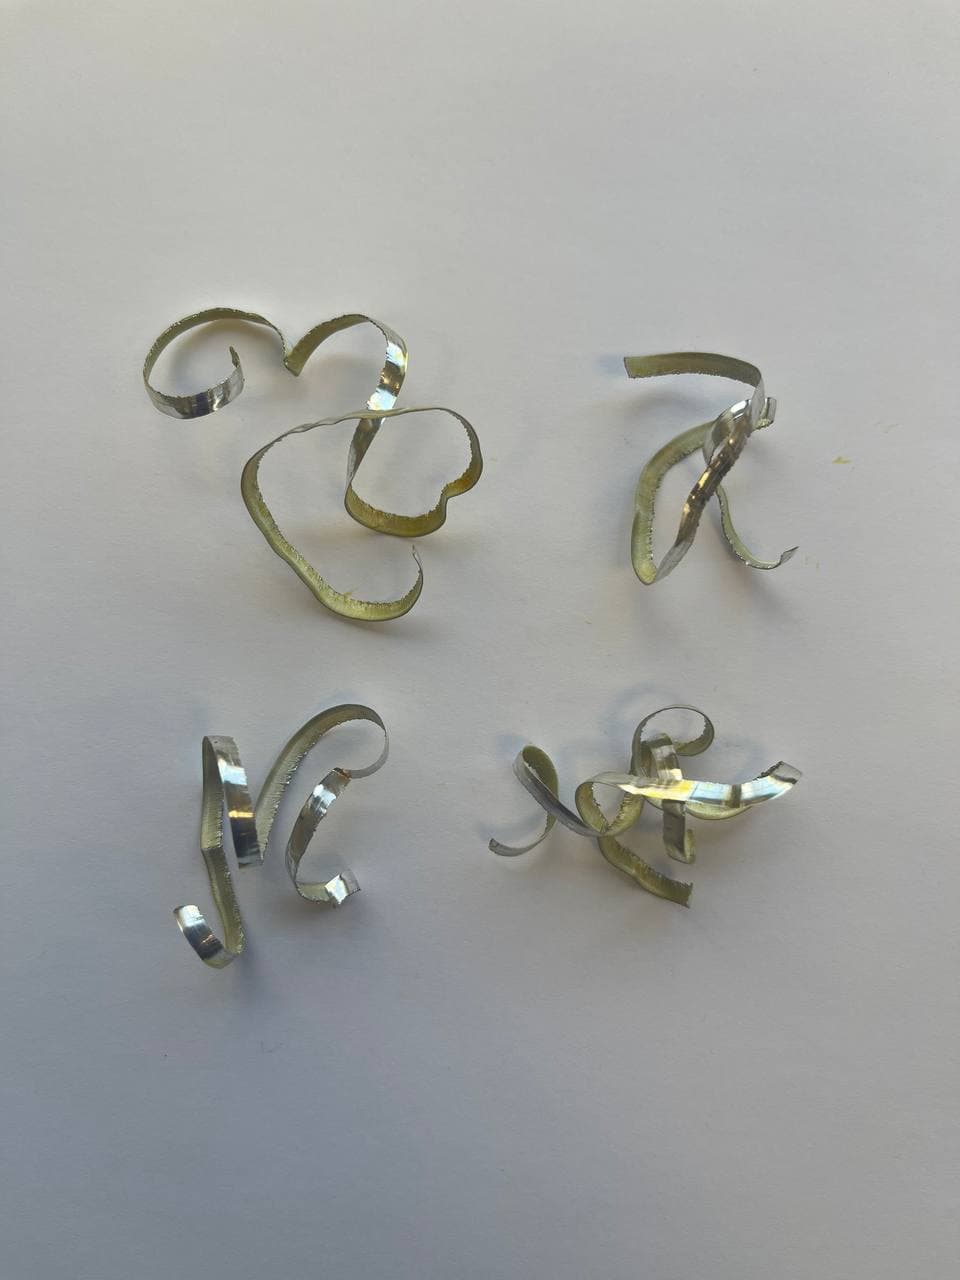 | 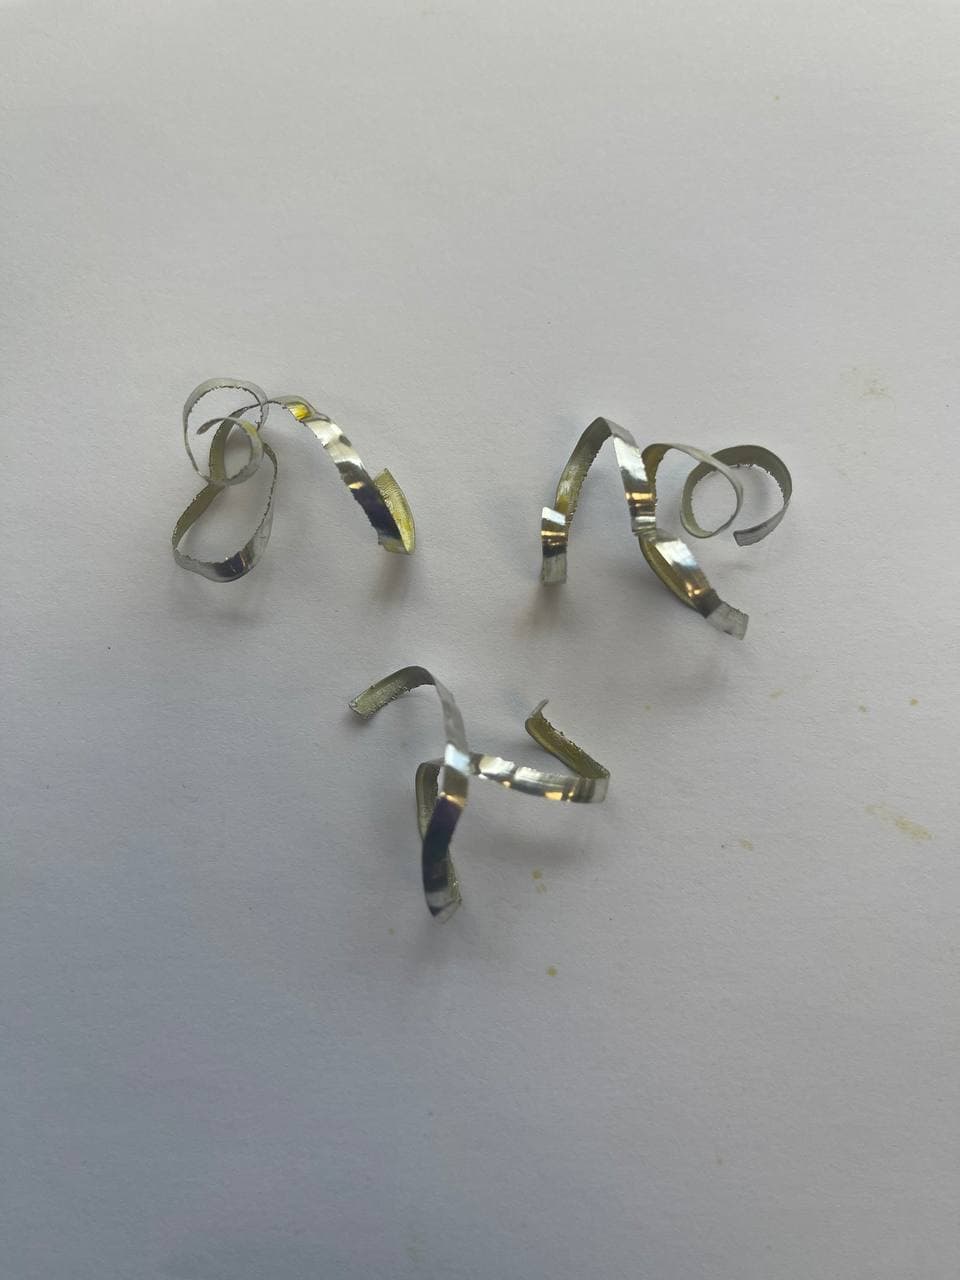 |
